# Using Modified Antigenic Sequences to Develop Cancer Vaccines: Are We Losing the Focus?

Danila Valmori\*, Maha Ayyoub

## Tumor Antigen Recognition by Cytolytic T Lymphocytes

CD8<sup>+</sup> cytolytic T lymphocytes (CTLs) are the primary effector cells of the adaptive immune system and have a major role in protecting us from a vast array of diseases including cancer. CTLs specifically recognize and lyse targets through the interaction of T cell receptors (TCRs) on the surface of the T lymphocyte with protein fragments (peptides) presented on the surface of target cells, in association with major histocompatibility complex (MHC) class I molecules. When a particular CTL interacts with a target cell, it rapidly divides to form a clonal population of T cells with the identical TCR.

Townsend and colleagues first elucidated the molecular basis of target cell recognition by CTLs in 1985 [1]. They showed that antigens are processed inside the target cell into nine- or ten-amino-acid-long peptides, which are then presented at the surface in association with MHC class I molecules. This discovery suggested the possibility of using short synthetic peptides mimicking naturally processed antigens as immunotherapeutic drugs and vaccines. Short synthetic peptides are ideal for drug development because of the relatively low cost of production, easy storage, and high safety. However, not all peptides and MHC alleles work well together to stimulate CTLs. So for clinical use, either patients would have to be selected for treatment based on their MHC I type or it would be necessary to make multiple peptides to cover the majority of MHC class I alleles in a given population.

The Perspectives section is for experts to discuss the clinical practice or public health implications of a published study that is freely available online.

Furthermore, before Boon and colleagues cloned the first antigen recognized by tumor-reactive CTLs in 1991 [2], it was not clear which antigens were recognized by tumor-reactive CTLs in humans; so, it was not possible to rationally design cancer vaccines. Now, however, a long list of more or less tumor-specific antigens has been generated [3]. Most of the peptides identified so far are either normal self proteins aberrantly expressed in cancer but not in most other adult normal tissues or tissue-specific antigens also expressed in certain types of cancer. Some patients show a spontaneous CD8<sup>+</sup> T cell response (occasionally at high levels) that is specific for several of these antigens. The development of such responses, however, requires a large tumor load, occurs late in the disease, and probably does not cause the efficient destruction of the tumor cells [4]. Thus, a central objective in cancer immunotherapy is to efficiently produce tumor-reactive CTLs at an earlier phase of the disease.

## Heteroclitic Tumor Antigen Peptides

Unfortunately, some synthetic peptides, including some corresponding to immunodominant epitopes (those which cause the biggest part of the immune response) from tumor antigens, only seem to bind MHC class I molecules with medium to low affinity and/or are recognized by specific T cells with relatively low avidity. These characteristics are the likely cause of the poor immune reaction generated by these peptides [5]. One strategy to improve the immune reaction is to make what are called heteroclitic antigen variants. By improving either peptide binding to MHC, recognition by TCRs, or both, these variants have increased peptide antigenicity and immunogenicity.

Solinger and colleagues were the first to describe antigen variants producing T cell responses that were stronger than those elicited by the parental sequences [6]. Some heteroclitic tumor antigen peptides that showed highly improved antigenicity and immunogenicity in preclinical studies, and which also cross-reacted well with CTLs generated against the parental sequence, were tested in clinical trials. The peptides selected for trials mostly contained substitutions of anchoring amino acids that were designed to increase peptide binding to the MHC molecule while minimally changing the shape of the epitope [7,8].

In a study by Lee and colleagues in this issue of *PLoS Medicine* [9], despite the careful study design, vaccination with these peptides resulted in the recruitment of T cells that bound antigens less efficiently and had lower tumor reactivity than those from the endogenous response to the tumor. The authors propose that the cause for the decreased affinity of vaccine-

**Citation:** Valmori D, Ayyoub M (2004) Using modified antigenic sequences to develop cancer vaccines: Are we losing the focus? *PLoS Med* 1(2): e26.

**Copyright:** © 2004 Valmori and Ayyoub. This is an open-access article distributed under the terms of the Creative Commons Attribution License, which permits unrestricted use, distribution, and reproduction in any medium, provided the original work is properly cited.

**Abbreviations:** CTL, CD8<sup>+</sup> cytolytic T lymphocyte; MHC, major histocompatibility complex; TCR, T cell receptor

Danila Valmori is associate professor of medical science and laboratory director and Maha Ayyoub is assistant professor of medical science at the Ludwig Institute Clinical Trial Center, Division of Medical Oncology, Department of Medicine, Columbia University, College of Physicians and Surgeons, New York, New York, United States of America.

\*To whom correspondence should be addressed. E-mail: dv2117@columbia.edu

**Competing Interests:** The authors declare that they have no competing interests.

**DOI:** 10.1371/journal.pmed.0010026

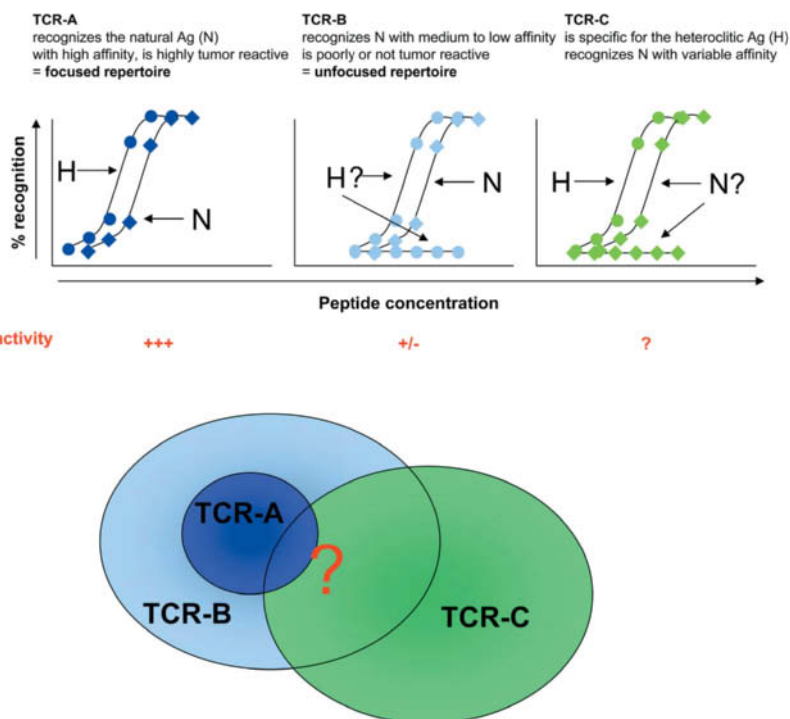

DOI: 10.1371/journal.pmed.0010026.g001

**Figure 1.** Synthetic Peptides Used for Vaccination May Fail to Faithfully Mimic the Naturally Processed Antigens

The TCR repertoire specific for the natural tumor antigen (N) contains a group of CD8<sup>+</sup> T cells that recognize N with high functional avidity and display high tumor reactivity (TCR-A, focused). TCR-A is stimulated by the natural ligand and expands during spontaneous responses to the tumor in some patients with antigen-expressing tumors. A larger group of CD8<sup>+</sup> T cells able to recognize N also exists in the naïve T cell repertoire (TCR-B). TCR-B recognizes N with decreased avidity and shows low to undetectable tumor reactivity (unfocused). Heteroclitic peptides (H) are analogs of N that contain modifications that increase their immunogenicity. They are selected on the basis of their increased recognition by T cells from the TCR-A group. When used as immunogens, they elicit a group of CD8<sup>+</sup> T cells specific for H (TCR-C). The reactivity of TCR-C will be variable and will depend on the extent of overlapping between the TCR-A, -B, and -C groups. In Lee and colleagues' study [9], most of the elicited CD8<sup>+</sup> T cells belong to the TCR-B group (unfocused), suggesting a large overlap between TCR-C and TCR-B and a more limited overlap of TCR-C with TCR-A. This phenomenon can be explained by the structural difference between N and H. Other factors that may differ between natural and peptide-induced immune responses, including the density of the peptide on antigen-presenting cells and the mode of presentation (i.e., the nature of antigen-presenting cells), could also contribute to the outcome.

elicited CTLs could be the high antigen density of these synthetic peptides on antigen-presenting cells. An alternative explanation, however, is that the synthetic peptides used for vaccination simply fail to faithfully mimic the naturally processed antigens (Figure 1). The use of peptides that differ from those resulting from natural intracellular processing has previously given rise to similar problems [10,11]. In any case, the enormous diversity in the normal TCR repertoire provides a molecular explanation of the observed phenomenon. These results emphasize how difficult it is to translate findings, such as the spectacular results obtained by the vaccination of TCR transgenic

mice with heteroclitic peptides [12], into an application for normal animals and humans.

### Conclusion

It is increasingly clear that even the smallest alteration in the structure of the MHC peptide complex can result in significant changes in which TCRs are selected after vaccination. Thus, manipulating the immune T cell repertoire in vivo through the use of heteroclitic tumor antigen peptide variants could be harder than anticipated. As the field moves rapidly towards the use of new vaccine adjuvants with high immunogenic potential [13], reassessment of the

immunogenicity of natural sequences could be worthwhile in some cases. In addition, the careful analysis of antigen-specific T cell clones, such as that reported here by Lee and colleagues, will be crucial to ascertain the quality of the elicited immune response. ■

### References

1. Townsend ARM, Gotch FM, Davey J (1985) Cytotoxic T cells recognize fragments of the influenza nucleoprotein. *Cell* 42: 457–467.
2. van der Bruggen P, Traversari C, Chomez P, Lurquin C, De Plaen E, et al. (1991) A gene encoding an antigen recognized by cytolytic T lymphocytes on a human melanoma. *Science* 254: 1643–1647.
3. Van den Eynde B, Van der Bruggen P (2003) Peptide database: T-cell defined tumor antigens. *Cancer Immunol.* Available: <http://www.cancerimmunity.org/peptidedatabase/Tcallepitopes.htm>. Accessed 2 September 2004.
4. Radoja S, Frey AB (2000) Cancer-induced defective cytotoxic T lymphocyte effector function: Another mechanism how antigenic tumors escape immune-mediated killing. *Mol Med* 6: 465–479.
5. Salgaller ML, Marincola FM, Cormier JN, Rosenberg SA (1996) Immunization against epitopes in the human melanoma antigen gp100 following patient immunization with synthetic peptides. *Cancer Res* 56: 4749–4757.
6. Solinger AM, Ultee ME, Margoliash E, Schwartz RH (1979) T-lymphocyte response to cytochrome c. I. Demonstration of a T-cell heteroclitic proliferative response and identification of a topographic antigenic determinant on pigeon cytochrome c whose immune recognition requires two complementing major histocompatibility complex-linked immune response genes. *J Exp Med* 150: 830–848.
7. Parkhurst MR, Salgaller ML, Southwood S, Robbins PF, Sette A, et al. (1996) Improved induction of melanoma-reactive CTL with peptides from the melanoma antigen gp100 modified at HLA-A\*0201-binding residues. *J Immunol* 157: 2539–2548.
8. Valmori D, Fonteneau JF, Lizana CM, Gervois N, Lienard D, et al. (1998) Enhanced generation of specific tumor-reactive CTL in vitro by selected Melan-A/MART-1 immunodominant peptide analogues. *J Immunol* 160: 1750–1758.
9. Stuge TB, Holmes SP, Saharan S, Tuettenberg A, Roederer M, et al. (2004) Diversity and recognition efficiency of T cell responses to cancer. *PLoS Med* 1: e28.
10. Chen W, Yewdell JW, Levine RL, Bennink JR (1999) Modification of cysteine residues in vitro and in vivo affects the immunogenicity and antigenicity of major histocompatibility complex class I-restricted viral determinants. *J Exp Med* 189: 1757–1764.
11. Dutoit V, Taub RN, Papadopoulos KP, Talbot S, Keohan, et al. (2002) Multiepitope CD8(+) T cell response to a NY-ESO-1 peptide vaccine results in imprecise tumor targeting. *J Clin Invest* 110: 1813–1822.
12. Yu Z, Theoret MR, Touloukian CE, Surman DR, Garman SC, et al. (2004) Poor immunogenicity of a self-/tumor antigen derives from peptide-MHC-I instability and is independent of tolerance. *J Clin Invest* 114: 551–559.
13. Burdin N, Moingeon P (2001) Cancer vaccines based on dendritic cells loaded with tumor-associated antigens. *Cell Biol Toxicol* 17: 67–75.
